# Supplementary material for: Revealing the impact of partial gene duplications in ASH1L: integration of optical genome mapping and RNA sequencing
Source: Research Square preprint supplement (doi:10.21203/rs.3.rs-6990354/v1), 2025-07-17
Supplement: Supplementary file 1 [file 84ce39fc74ce4cc427659041.pdf]

## Supplementary material

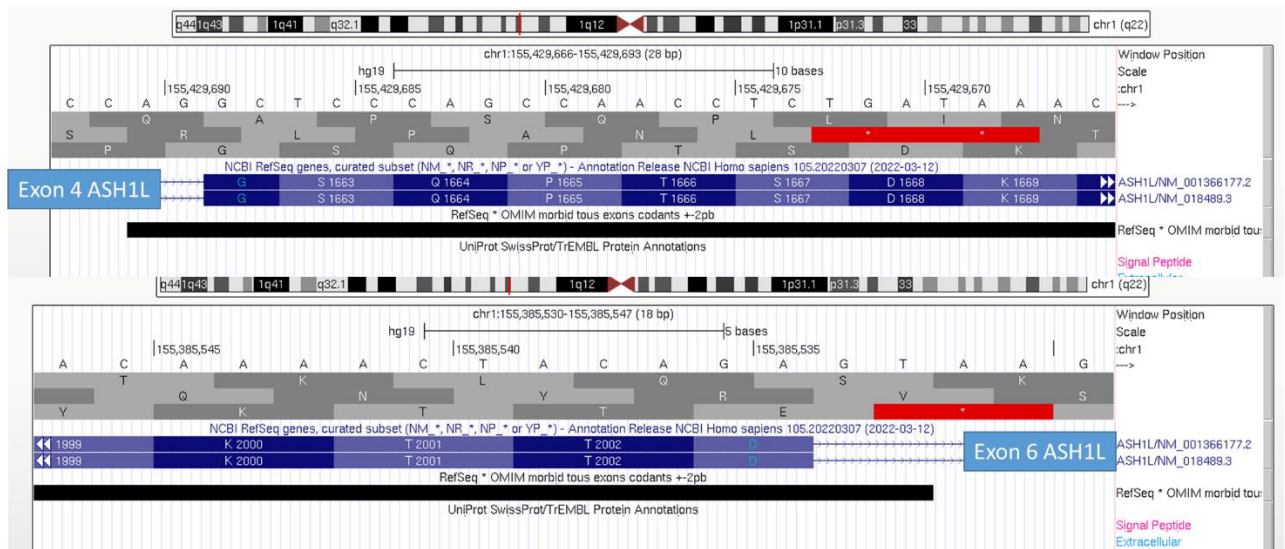

**Supplementary Figure 1.**

Reverse UCSC genome browser view of exons 4 and 6 of ASH1L, with the nucleotide track in full to visualize the three genomic frames. The end of exon 6 is directly followed by exon 4: the last amino acid of exon 6 contains only 2 nucleotides (GA), which normally codes for Asp, but with the frameshift mutation (C>G), it results in p.Asp>Glu. With the track of the three possible frames on UCSC, the sequence continues on the second frame line, starting with a Leu, and has a stop codon at the 7th position.

| Caractéristiques du variant                                     |                                                                                     |
|-----------------------------------------------------------------|-------------------------------------------------------------------------------------|
| <b>Niveau Génomique</b>                                         |                                                                                     |
| Version du génome :                                             | GRCh37                                                                              |
| Chromosome :                                                    | Chr1 (q22)                                                                          |
| gADN:                                                           | g.155365344G>C                                                                      |
| Type:                                                           | Substitution                                                                        |
| <b>Niveau des protéines</b>                                     |                                                                                     |
| Coding Effect:                                                  | Missense                                                                            |
| pNomen:                                                         | p.(Asp2003Glu)                                                                      |
| Compare AA:                                                     |  |
| Effet possible sur le site d'epissage le plus proche            |                                                                                     |
| <a href="#">Voir les prédictions dans la fenêtre d'épissage</a> |                                                                                     |
| <b>Niveau du Transcript</b>                                     |                                                                                     |
| cADN :                                                          | NM_018489.3(ASH1L):c.6009C>G                                                        |
| Position:                                                       | Exon 7                                                                              |
| Exon naming:                                                    | Systematic numbering (1..n)                                                         |
| <b>Outils Externes</b>                                          |                                                                                     |
| <a href="#">VariantValidator</a>                                | <a href="#">Mutalyzer</a>                                                           |

### Supplementary Figure 2.

Simulation using Alamut software by creating a variant on the first codon of exon 7, c.6009C>G, to identify the first changed amino acid.
